# Supplementary material for: A broadband yellow Yb2+-doped oxynitride phosphor for high-performance white light-emitting diodes
Source: Royal Society of Chemistry journal article supplement (doi:10.1039/d2qi01444k), 2022-01-01
Supplement: d2qi01444k1.pdf [file d2qi01444k1.pdf]

## Electronic Supplementary Information

### A broadband yellow Yb<sup>2+</sup>-doped oxynitride phosphor for high-performance white light-emitting diodes

Ying Lv<sup>\*,a,b</sup>, Yunkai Li<sup>a</sup>, Siting Fan<sup>a</sup>, Changjian Chen<sup>b</sup>, Yuting Cai<sup>b</sup>, Hai Xu<sup>c</sup>, and Rong-Jun Xie<sup>\*,b</sup>

<sup>a</sup>Nanchang Key Laboratory of Photoelectric Conversion and Energy Storage Materials, College of Science, Nanchang Institute of Technology, Nanchang 330099, China

<sup>b</sup>College of Materials, Xiamen University, Xiamen 361005, China

<sup>c</sup>Lattice Power Corporation, Nanchang 330029, China

\*E-mail: yinglv@nit.edu.cn; rjxie@xmu.edu.cn

## Table of Contents

|                 |      |
|-----------------|------|
| Figure S1 ..... | S-2  |
| Figure S2 ..... | S-3  |
| Figure S3 ..... | S-4  |
| Figure S4 ..... | S-5  |
| Figure S5 ..... | S-6  |
| Figure S6 ..... | S-7  |
| Figure S7 ..... | S-8  |
| Figure S8 ..... | S-9  |
| Figure S9 ..... | S-10 |

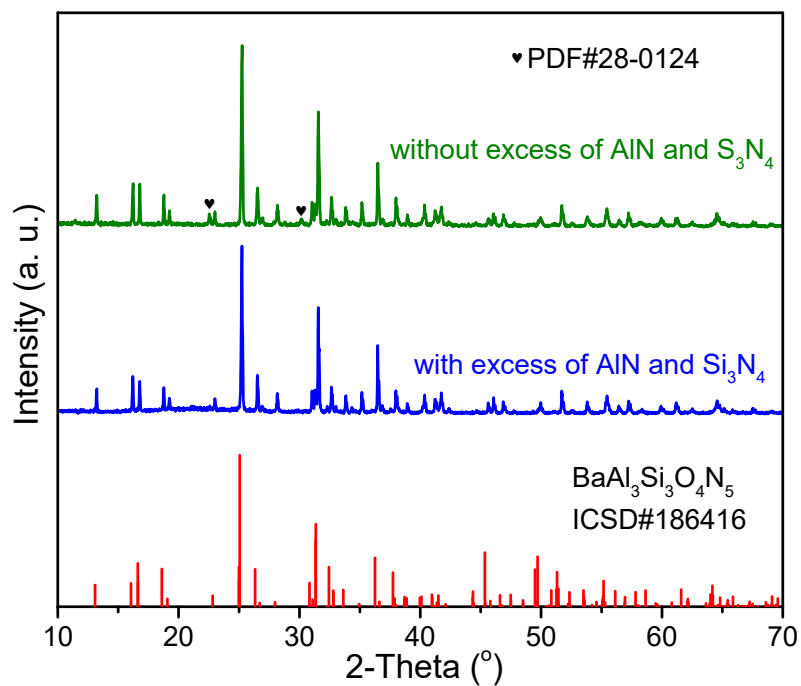

Figure S1. XRD results of target samples with or without the excess of AlN and Si<sub>3</sub>N<sub>4</sub> in the synthetic method. Standard card of BaAl<sub>3</sub>Si<sub>3</sub>O<sub>4</sub>N<sub>5</sub> (ICSD#186416) is also given as reference.

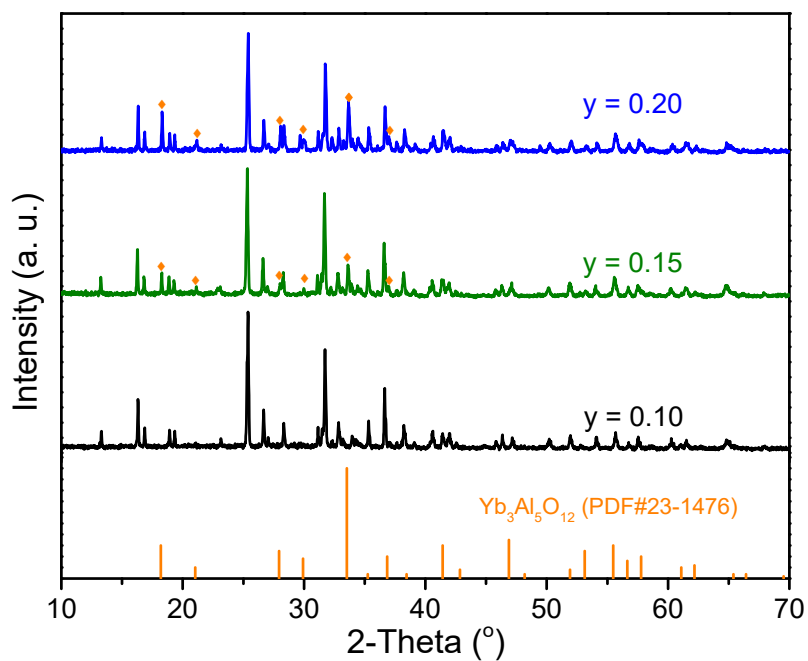

Figure S2. XRD patterns of  $\text{Ba}_{0.6-y}\text{Sr}_{0.4}\text{Si}_3\text{Al}_3\text{O}_4\text{N}_5:\text{yYb}^{2+}$  ( $y = 0.10, 0.15, \text{ and } 0.20$ ) phosphors. Standard card of  $\text{Yb}_3\text{Al}_5\text{O}_{12}$  (PDF#23-1776) is used to illustrate the impurity growth under a certain doping concentration.

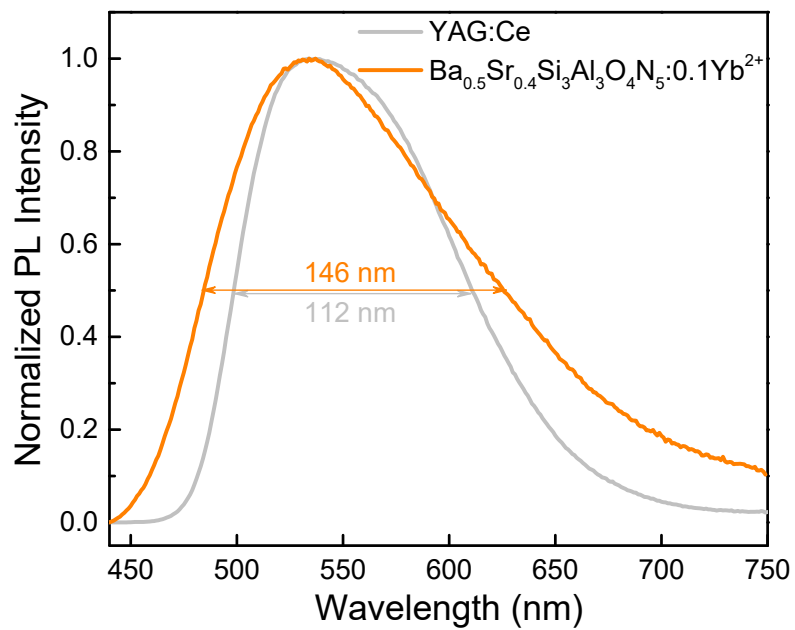

Figure S3. Comparison of emission spectra of  $\text{Ba}_{0.5}\text{Sr}_{0.4}\text{Si}_3\text{Al}_3\text{O}_4\text{N}_5:0.1\text{Yb}^{2+}$  and commercial YAG:Ce phosphor. A broader emission makes  $\text{Ba}_{0.5}\text{Sr}_{0.4}\text{Si}_3\text{Al}_3\text{O}_4\text{N}_5:0.1\text{Yb}^{2+}$  can be used for high Ra and low CCT w-LEDs.

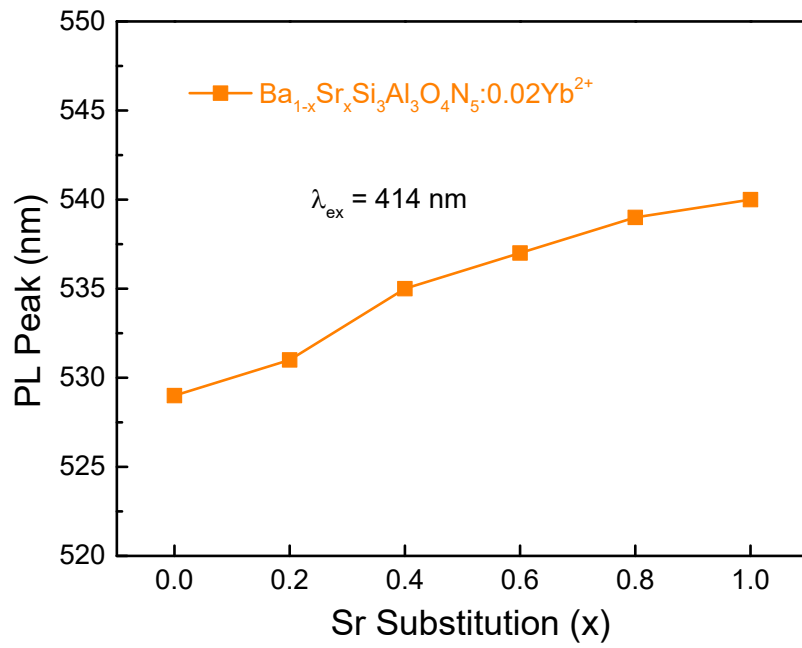

Figure S4. PL peaks as function of Sr substitution in  $\text{Ba}_{1-x}\text{Sr}_x\text{Si}_3\text{Al}_3\text{O}_4\text{N}_5:0.02\text{Yb}^{2+}$  ( $x = 0 - 1$ ) under the excitation of 414 nm.

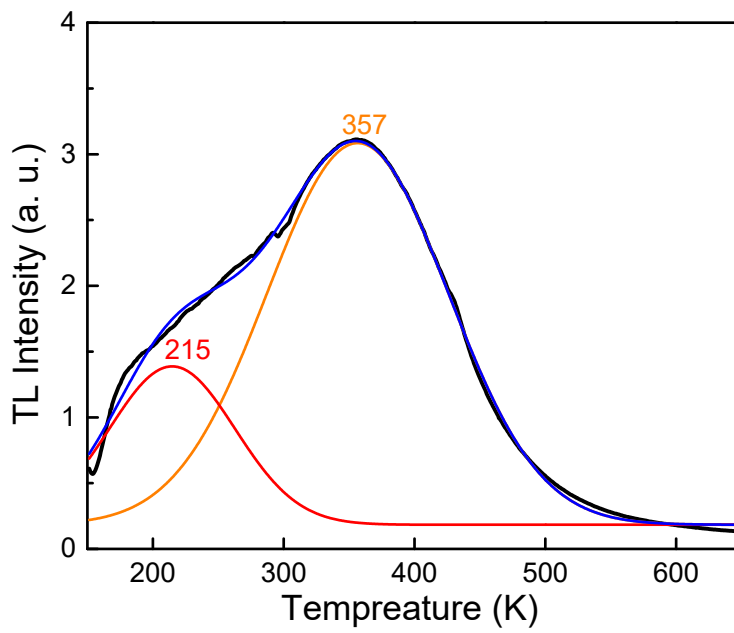

Figure S5. TL spectrum of Ba<sub>0.5</sub>Sr<sub>0.4</sub>Si<sub>3</sub>Al<sub>3</sub>O<sub>4</sub>N<sub>5</sub>:0.1Yb<sup>2+</sup> after irradiation of 254 nm for 5 min in the temperature range from 300 to 650 K. Two fitted broadband TL peaks (215 and 357 K) mean that instinct defects exist in Ba<sub>0.5</sub>Sr<sub>0.4</sub>Si<sub>3</sub>Al<sub>3</sub>O<sub>4</sub>N<sub>5</sub>:0.1Yb<sup>2+</sup>.

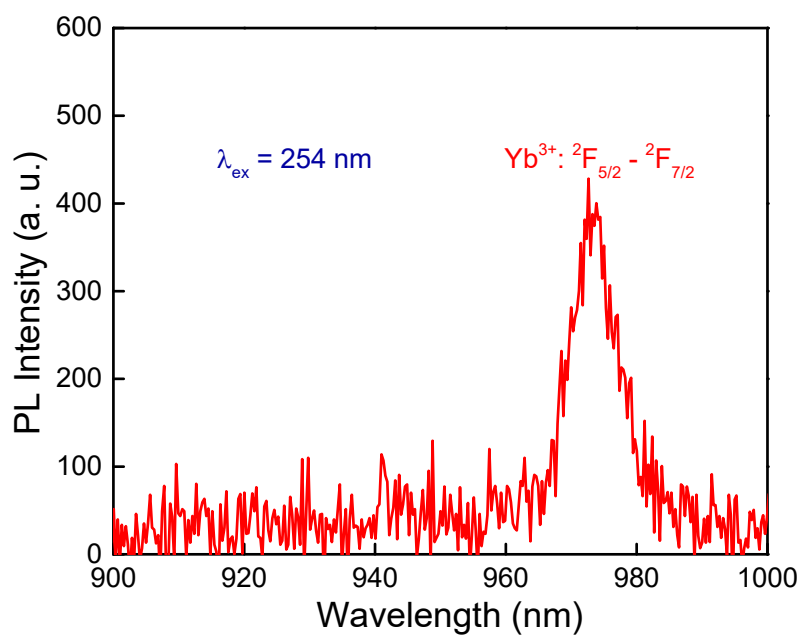

Figure S6. PL spectrum of Yb-doped Ba<sub>0.5</sub>Sr<sub>0.4</sub>Si<sub>3</sub>Al<sub>3</sub>O<sub>4</sub>N<sub>5</sub> under the excitation of 254 nm. Typical NIR emission around 973 nm indicates the existing of Yb<sup>3+</sup> ions in this oxynitride phosphor.

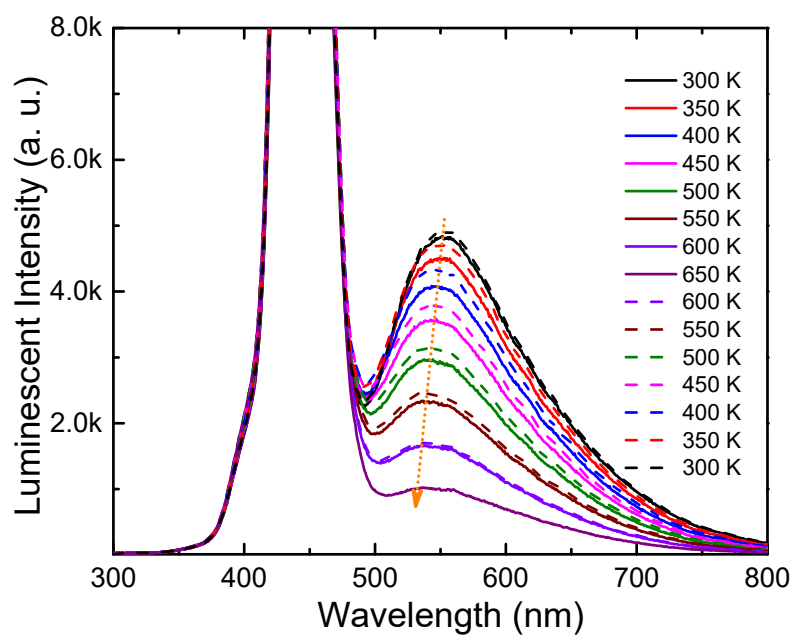

Figure S7. PL spectra of  $\text{Ba}_{0.5}\text{Sr}_{0.4}\text{Si}_3\text{Al}_3\text{O}_4\text{N}_5:0.1\text{Yb}^{2+}$  under different temperature from 300 - 650 K. The emission peak positions of  $\text{Ba}_{0.5}\text{Sr}_{0.4}\text{Si}_3\text{Al}_3\text{O}_4\text{N}_5:0.1\text{Yb}^{2+}$  are slightly red-shifted due to the excitation wavelength exceeds 420 nm in thermal quenching measurement.



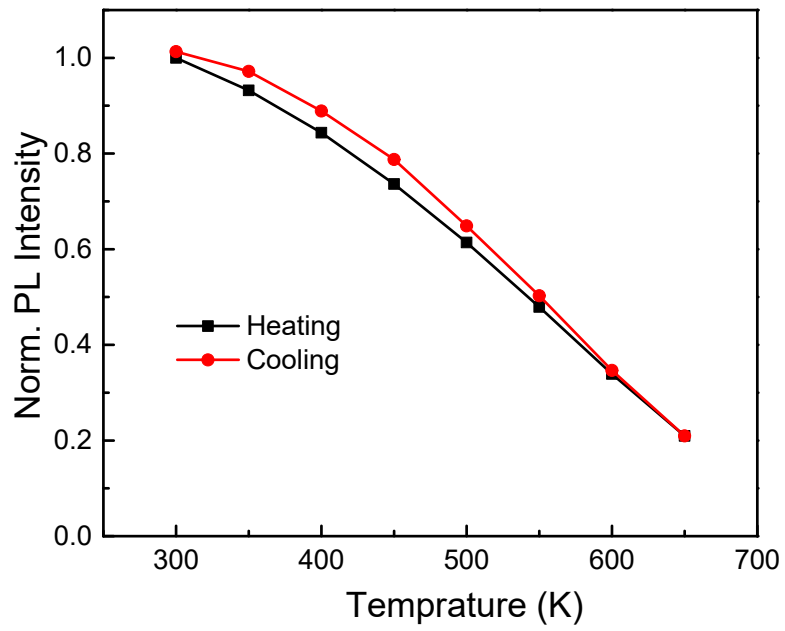

Figure S8. Normalized PL peak intensities of  $\text{Ba}_{0.5}\text{Sr}_{0.4}\text{Si}_3\text{Al}_3\text{O}_4\text{N}_5:0.1\text{Yb}^{2+}$  under different temperature from 300 - 650 K.

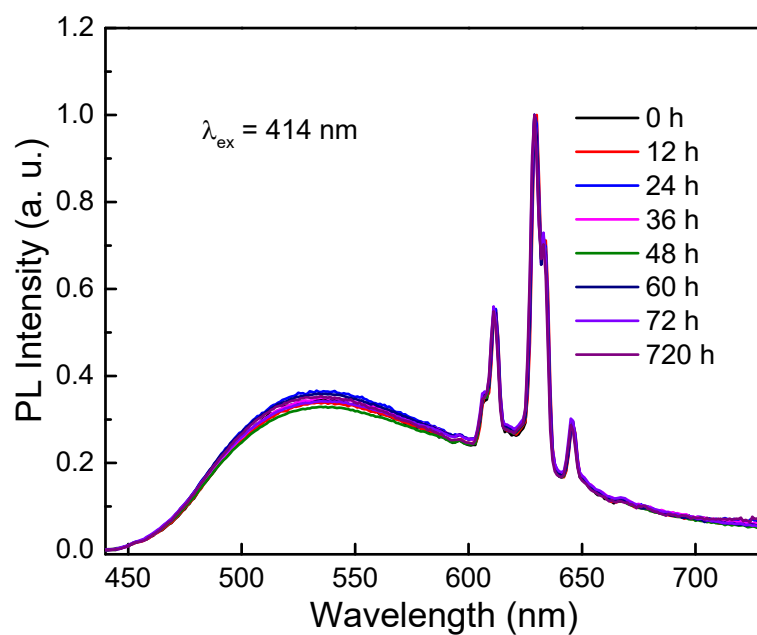

Figure S9. Normalized PL spectra ( $\lambda_{\text{ex}} = 414 \text{ nm}$ ) of the mixtures, which were mixed soaked  $\text{Ba}_{0.5}\text{Sr}_{0.4}\text{Si}_3\text{Al}_3\text{O}_4\text{N}_5:0.1\text{Yb}^{2+}$  in water for different time with KSF in a fixed mass ratio of 5:2 (all emission intensities of KSF were normalized to 1). The emission peak ( $\sim 538 \text{ nm}$ ) intensities from soaked  $\text{Ba}_{0.5}\text{Sr}_{0.4}\text{Si}_3\text{Al}_3\text{O}_4\text{N}_5:0.1\text{Yb}^{2+}$  indicate the excellent waterproof stability of  $\text{Ba}_{0.5}\text{Sr}_{0.4}\text{Si}_3\text{Al}_3\text{O}_4\text{N}_5:0.1\text{Yb}^{2+}$ .
